# Supplementary material for: TGF-β prevents the denervation-induced reduction of bone formation and promotes the bone regeneration through inhibiting ubiquitin-proteasome pathway
Source: Oxford University Press journal article supplement (doi:10.1042/bsr20190350), 2019-04-23
Supplement: bsr-2019-0350_supp.pdf [file bsr-2019-0350_supp.pdf]

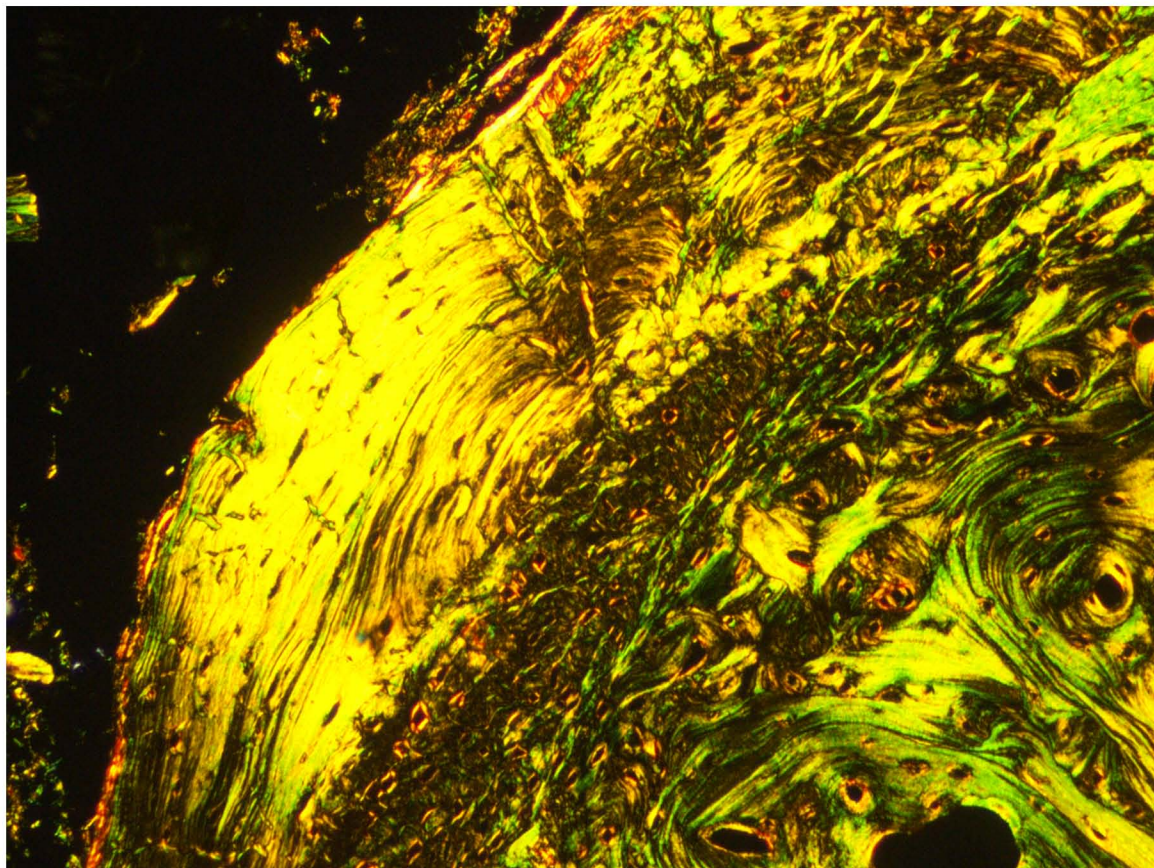

×200

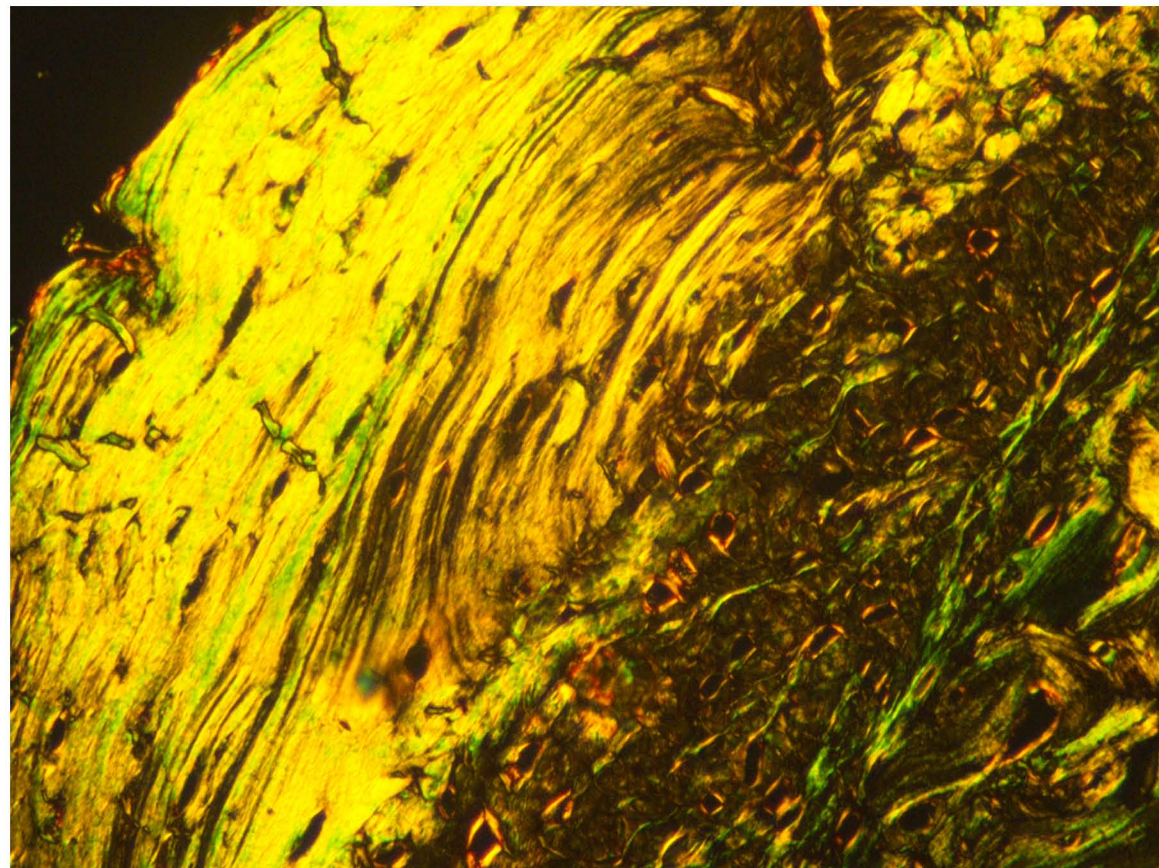

×400
